# Supplementary material
Source: Research Square preprint supplement (doi:10.21203/rs.3.rs-9380884/v1)
Supplement: Supplementary file 1 [file ac0a64aa26eb474c3ca0223b.docx]

**COREQ (Consolidated Criteria for Reporting Qualitative Research) Checklist**

*H.A.P.A, V.R.V., D.C.G.D, W.A.A-A. Personal Identity Construction in Colombian Rural Childhoods: A Phenomenological Study.*

Journal: Child Indicators Research | Submitted: 2026

| **#** | **Domain** | **Item** | **Response — this study** | **Page** |
| --- | --- | --- | --- | --- |
| **Domain 1: Research team and reflexivity** | | | | |
| **Personal characteristics** | | | | |
| 1 | *Interviewer/ facilitator* | Which author/s conducted the interview or focus group? | V.R.V (psychology student) and D.C.G.D (Mg.) conducted the interviews; H.A.A.A supervised the process. | Methods |
| 2 | *Credentials* | What were the researcher's credentials, e.g. PhD, MD? | H.A.P.A.: PhD in Theory and Research in Behavior. D.C.G.D: Master's in Education. V.R.V: Undergraduate psychology student. W.A.A-A.: Speech-Language Pathologist; Master’s in Education. | Title page |
| 3 | *Occupation* | What was their occupation at the time of the study? | H.A.P.A, V.R.V, and D.C.G.D are affiliated with UNIVERSITY BLINDED FOR REVIEW PURPOSE W.A.A.A. is affiliated with UNIVERSITY BLINDED FOR REVIEW PURPOSE. | Title page |
| 4 | *Gender* | Was the researcher male or female? | Two male (H.A.P-A., W.A.A-A), two female (V.R-V., D.C.G-D.). | — |
| 5 | *Experience and training* | What experience or training did the researcher have? | The research team has experience in qualitative developmental psychology research. Training in phenomenological methodology and child interview techniques was applied. | Methods |
| **Relationship with participants** | | | | |
| 6 | *Relationship established* | Was a relationship established prior to study commencement? | No prior relationship. First contact was established through the Community Action Board leader, who facilitated access to the families. | Methods |
| 7 | *Participant knowledge of the interviewer* | What did the participants know about the researcher, e.g. aims of the study? | Participants and their guardians were informed of the study purpose (understanding children's personal identity in rural contexts), the academic affiliation of the researchers, and the voluntary nature of participation before consent was sought. | Methods |
| 8 | *Interviewer characteristics* | What characteristics were reported about the interviewer/facilitator, e.g., personal goals, reasons for doing the research, assumptions? | The researchers acknowledged their positionality as urban-based academics studying a rural community. This reflexivity was integrated into the discussion of limitations and the validation process with community actors. | Discussion |
| **Domain 2: Study design** | | | | |
| **Theoretical framework** | | | | |
| 9 | *Methodological orientation and theory* | What methodological orientation was stated to underpin the study, e.g. grounded theory, discourse analysis, ethnography, phenomenology, content analysis? | Qualitative approach grounded in descriptive phenomenology (Moustakas, 1994) and cultural psychology, aimed at understanding how rural children experience and narrate the construction of their personal identity. Data analysis proceeded in two complementary stages: (1) self-narratives were analyzed using three theoretical sensitizers derived from Quiroga et al.’s (2021) personal identity model — unity of the self, integration of the self, and integration with others — functioning as conceptual lenses rather than fixed a priori categories (Blumer, 1954; Van den Hoonaard, 1997); and (2) semi-structured interview transcripts were subjected to open thematic content analysis, yielding three emergent categories (child labor, interpersonal relationships, rural perspective). After individual case analysis, a cross-case structural synthesis identified invariant features of experience across participants. | Methods |
| **Participant selection** | | | | |
| 10 | *Sampling* | How were participants selected, e.g. purposive, convenience, consecutive, snowball? | Purposive sampling. Participants were identified by the Community Action Board leader based on pre-established inclusion criteria (age 8–12; residence ≥5 years; voluntary participation with parental consent). | Methods |
| 11 | *Method of approach* | How were participants approached, e.g. face-to-face, telephone, mail, email? | Face-to-face approach through the Community Action Board leader, who served as community gatekeeper and facilitated initial contact with families. | Methods |
| 12 | *Sample size* | How many participants were in the study? | Six children (three boys, three girls), aged 8–12 years (mean age: 10.2 years). | Methods |
| 13 | *Non-participation* | How many people refused to participate or dropped out? Reasons? | Not reported. All families approached through the Board leader agreed to participate. No dropouts occurred. | — |
| **Setting** | | | | |
| 14 | *Setting of data collection* | Where was the data collected, e.g. home, clinic, workplace? | A room in the Community Action Board headquarters of vereda Retiro Chiquito, Bucaramanga, Santander, Colombia. | Methods |
| 15 | *Presence of non-participants* | Was anyone else present besides the participants and researchers? | During initial interviews, the Community Action Board leader was present as a trust figure for the children, with prior caregiver authorization. Researchers were present for all interviews. | Methods |
| 16 | *Description of sample* | What are the important characteristics of the sample, e.g. demographic data, date? | Six children aged 8–12 years from rural vereda Retiro Chiquito, Bucaramanga. Diverse family configurations (nuclear, extended, single-parent). Educational level: 3rd–6th grade of primary school. Data collected February–June 2023. | Methods |
| **Data collection** | | | | |
| 17 | *Interview guide* | Were questions, prompts, guides provided by the authors? Was it pilot tested? | Semi-structured interview guide covering: family relationships, natural environment, child labor, daily activities, and urban–rural differences. The guide was reviewed by the research team but formal pilot testing is not reported. | Methods |
| 18 | *Repeat interviews* | Were repeat interviews carried out? If yes, how many? | No. Each participant completed one semi-structured interview and one self-narrative text. | Methods |
| 19 | *Audio/visual recording* | Did the research use audio or visual recording? | Interview responses and self-narratives were transcribed by the researchers. The use of audio recording is not explicitly stated in the manuscript. | Methods |
| 20 | *Field notes* | Were field notes made during and/or after the interview or focus group? | Not explicitly reported. Transcription and analysis were conducted by the research team following the sessions. | — |
| 21 | *Duration* | What was the duration of the interviews or focus group? | Semi-structured interviews averaged 30 minutes. | Methods |
| 22 | *Data saturation* | Was data saturation discussed? | Yes. Thematic saturation was achieved as narrative patterns repeated and complemented each other across participants without the emergence of new relevant categories toward the close of analysis. | Methods |
| 23 | *Transcripts returned* | Were transcripts returned to participants for comment and/or correction? | Not reported. Validation was carried out through researcher triangulation, systematic use of verbatim participant quotations as evidential anchors, and validation of the research process with the Community Action Board leader. Formal member checking — returning transcripts or findings to child participants for review — was not conducted, given the age of participants (8–12 years) and the logistical constraints of accessing the territory. This limitation is acknowledged and discussed in the manuscript. | Methods |
| **Domain 3: Analysis and findings** | | | | |
| **Data analysis** | | | | |
| 24 | *Number of data coders* | How many data coders coded the data? | Three researchers collaboratively analyzed all data. In Stage 1 (self-narratives), the three sensitizing categories were applied independently by each researcher and then compared and discussed until consensus was reached. In Stage 2 (interviews), open thematic coding was conducted independently and then triangulated across researchers. A cross-case structural synthesis was conducted collaboratively to identify invariant experiential structures across the six participants, consistent with descriptive phenomenological method (Moustakas, 1994). | Methods |
| 25 | *Description of the coding tree* | Did authors provide a description of the coding tree? | Yes. Three theoretical sensitizers were derived from Quiroga et al. (2021): unity of the self, integration of the self, and integration with others. These functioned as conceptual lenses orienting analytic attention without foreclosing data-driven meaning (Blumer, 1954). Three additional categories emerged inductively from the interview data: child labor, interpersonal relationships, and rural perspective. A final cross-case synthesis produced three structural invariants: (1) identity as territorially grounded; (2) identity as constituted through adaptive relational intelligence; and (3) identity as integrating rootedness and aspiration without contradiction. The unit of analysis was the narrative utterance in its totality: content, ordering, form, compression, and internal tensions. | Results |
| 26 | *Derivation of themes* | Were themes identified in advance or derived from the data? | Mixed deductive-inductive approach. In Stage 1, three theoretical sensitizers (Quiroga et al., 2021) oriented the analysis of self-narratives without imposing fixed categories. In Stage 2, three themes emerged inductively from open analysis of interview transcripts. A final structural synthesis was derived cross-case, identifying experiential invariants through descriptive phenomenological method (Moustakas, 1994). This two-stage approach is consistent with the use of sensitizing concepts in qualitative phenomenological research (Blumer, 1954; Van den Hoonaard, 1997). | Methods / Results |
| 27 | *Software* | What software, if applicable, was used to manage the data? | Not reported. Manual content analysis was conducted by the research team. | — |
| 28 | *Participant checking* | Did participants provide feedback on the findings? | Partial. Validation with community actors was conducted. Direct participant checking of final findings is not reported. | Methods |
| **Reporting** | | | | |
| 29 | *Quotations presented* | Were participant quotations presented to illustrate the themes/findings? Was each quotation identified? e.g. participant number | Yes. Verbatim quotes are presented in Tables 1 and 2, identified by participant number, sex (boy/girl), and age. Names were anonymized with [name]. | Results |
| 30 | *Data and findings consistent* | Was there consistency between the data presented and the findings? | Yes. All interpretive claims in the Results and Discussion sections are grounded in verbatim excerpts from participants and supported by the cited literature. | Results / Discussion |
| 31 | *Clarity of major themes* | Were major themes clearly presented in the findings? | Yes. Six categories (three a priori, three emerging) are clearly defined, described, and illustrated with participant quotes in structured tables. | Results |
| 32 | *Clarity of minor themes* | Is there a description of diverse cases or discussion of minor themes? | Yes. Minor themes such as gender differences in child labor tasks and variability in adult responsiveness were explicitly discussed within their respective categories. | Results / Discussion |

*Tong A, Sainsbury P, Craig J. Consolidated criteria for reporting qualitative research (COREQ): a 32-item checklist for interviews and focus groups. Int J Qual Health Care. 2007;19(6):349–357. doi:10.1093/intqhc/mzm042*
